# Supplementary material for: Cellular communication network factor 1‐stimulated liver macrophage efferocytosis drives hepatic stellate cell activation and liver fibrosis
Source: PubMed Central journal article supplement — Hepatol Commun. 2022 Aug 5;6(10):2798–811. doi: 10.1002/hep4.2057 (PMC9512468; doi:10.1002/hep4.2057), 2022-08-05
Supplement: HEP4-6-2798-s001.pdf [file HEP4-6-2798-s001.pdf]

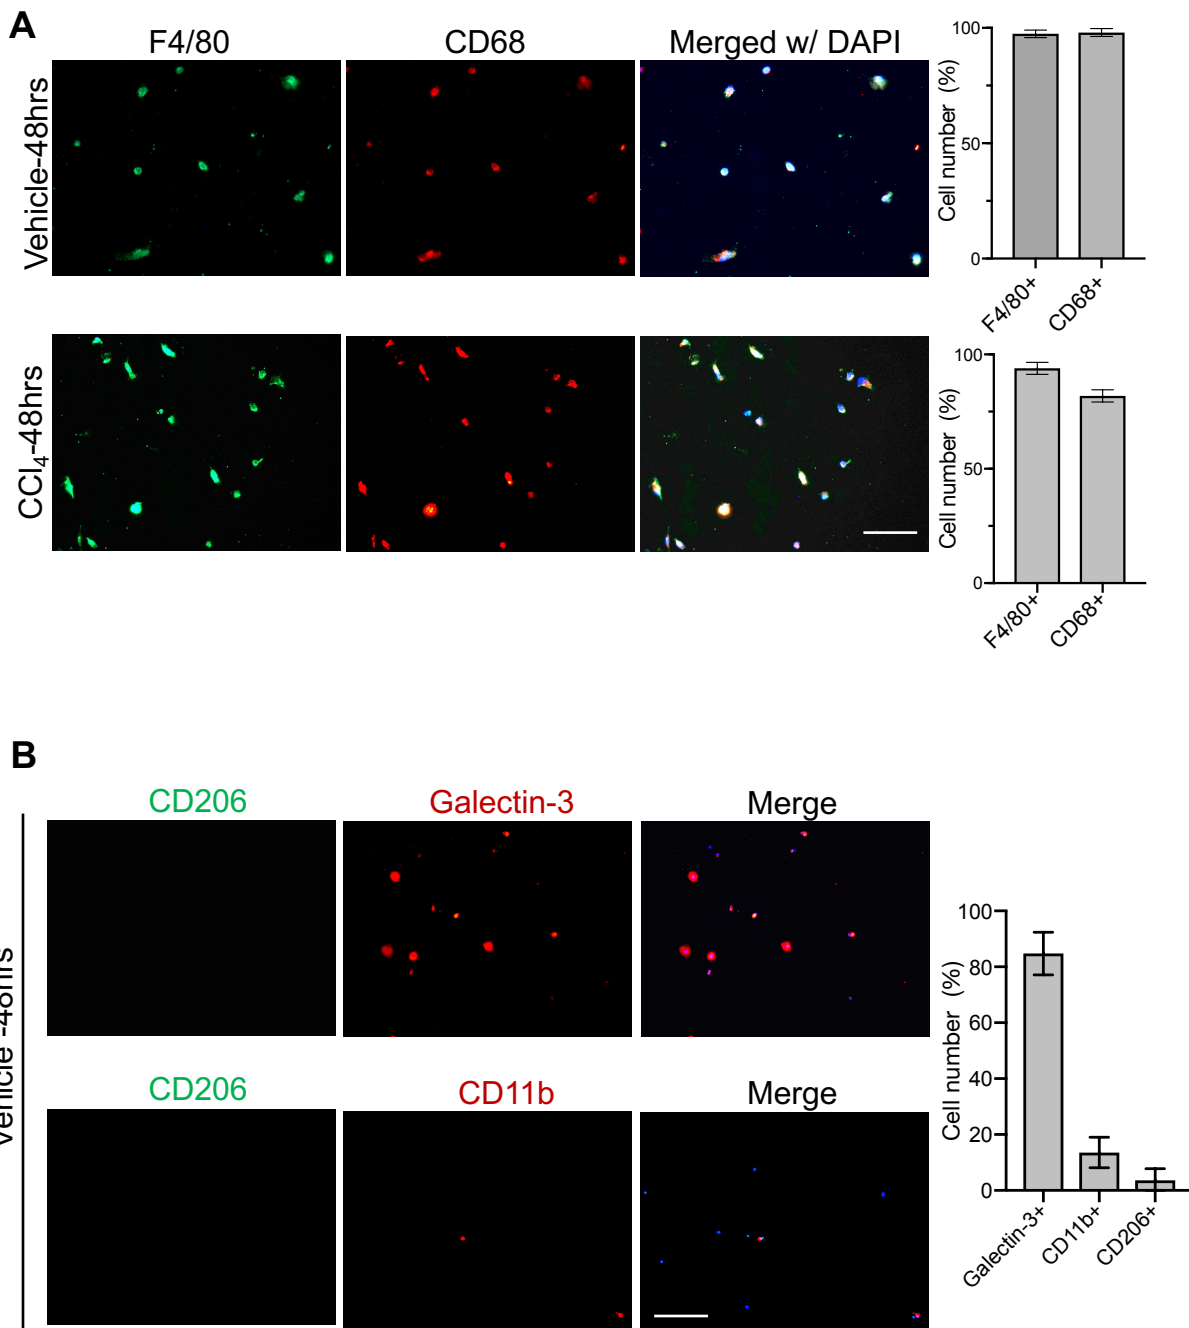

**Figure S1.** (A) *Ccn1*<sup>WT/WT</sup> liver macrophages isolated 48 hrs after injection of vehicle or CCl<sub>4</sub> were cultured overnight and stained with anti-CD68 and anti-F4/80 antibodies and counterstained with DAPI. (B) *Ccn1*<sup>WT/WT</sup> liver macrophages isolated 48 hrs after injection of vehicle were co-stained with anti-CD206 antibody and anti-Galectin-3 antibody or anti-CD206 antibody and anti-CD11b antibody. The percentages of positive cells were quantified ( $n=4$ ). Data represents means  $\pm$  SD. Scale bars: 100  $\mu$ m.

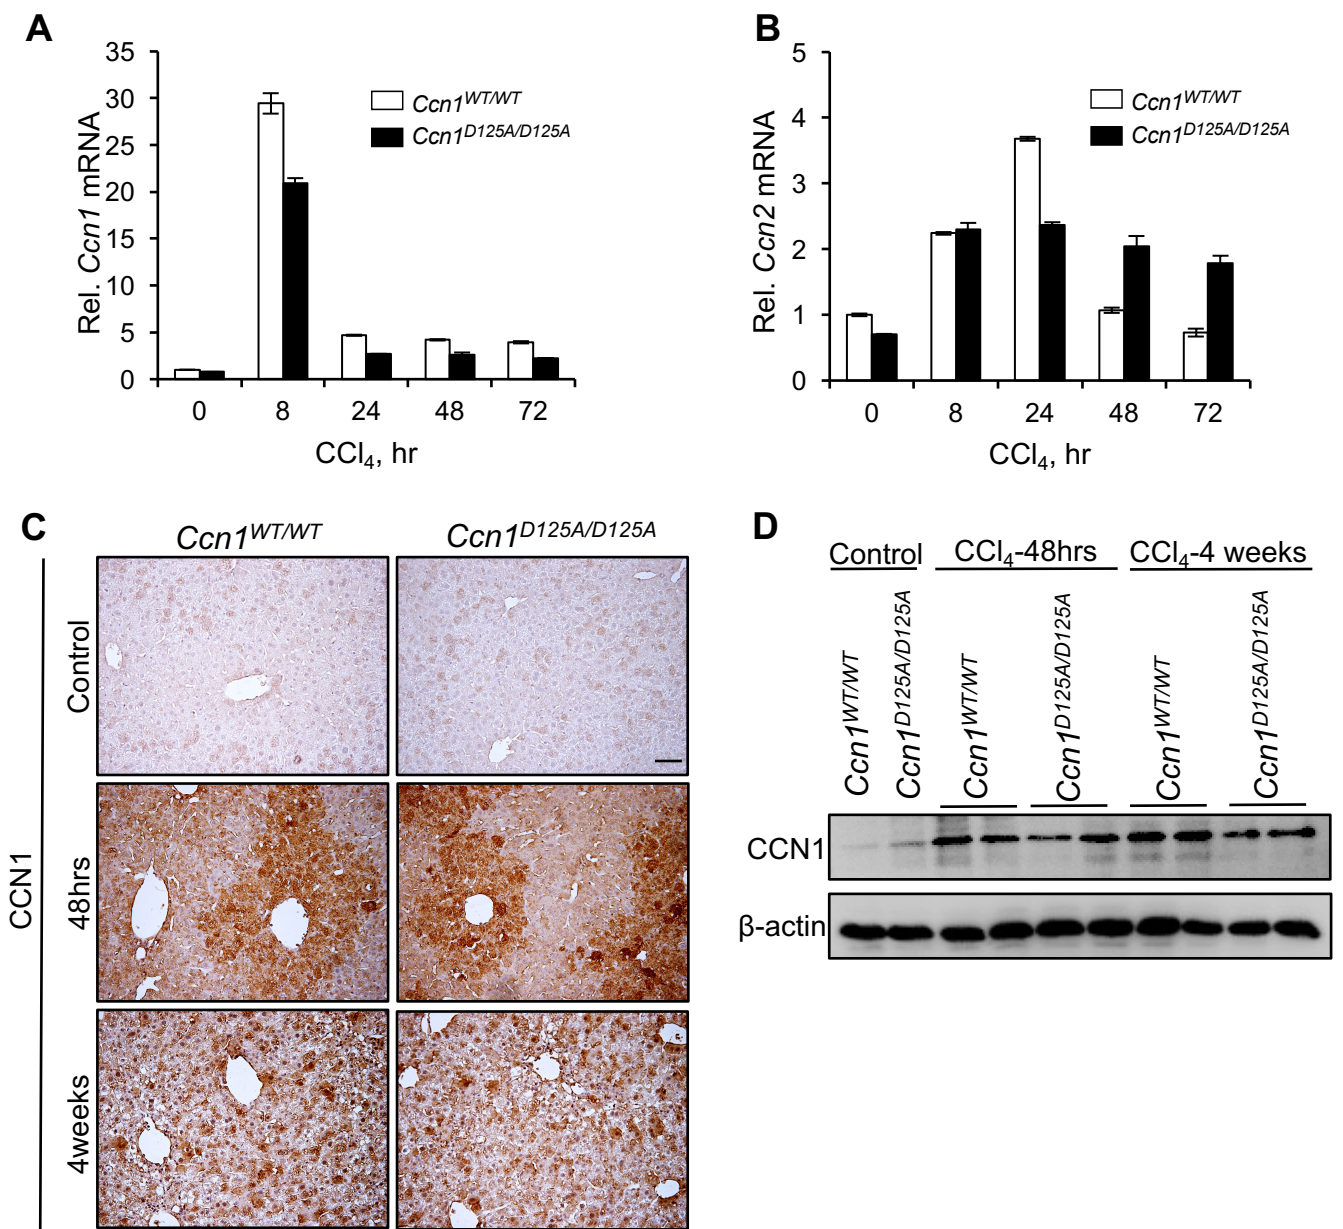

**Figure S2.** *Ccn1*<sup>WT/WT</sup> and *Ccn1*<sup>D125A/D125A</sup> mice were i.p. injected with CCl<sub>4</sub>, and *Ccn1* (A) or *Ccn2* (B) expression was analyzed by qRT-PCR in liver RNA isolated at the indicated times ( $n=6$ ). (C) Liver sections from *Ccn1*<sup>WT/WT</sup> and *Ccn1*<sup>D125A/D125A</sup> mice after injection with CCl<sub>4</sub> for indicated times were stained with anti-CCN1 antibody. (D) Immunoblots of protein extracts from the indicated livers were probed with antibodies against CCN1 and  $\beta$ -actin. Scale bars: 100  $\mu$ m.

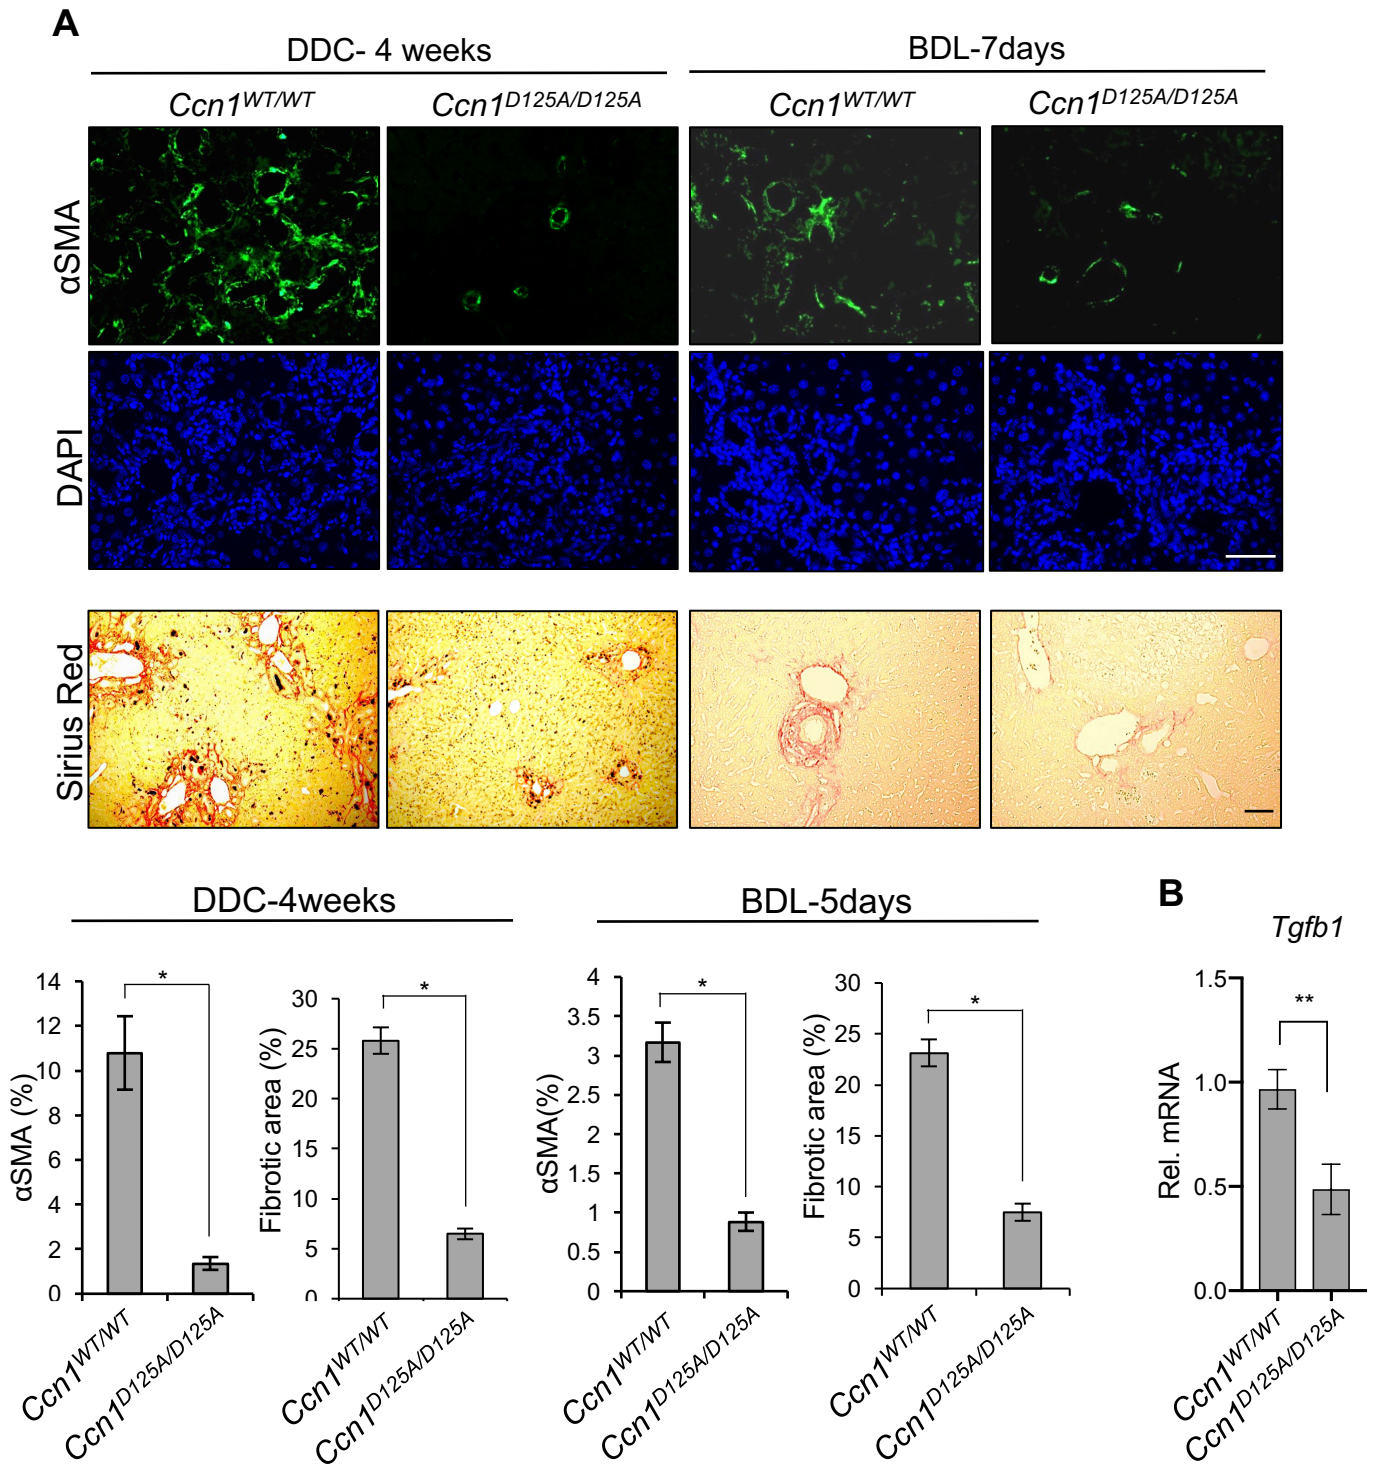

**Figure S3.** (A) Liver sections from *Ccn1*<sup>WT/WT</sup> and *Ccn1*<sup>D125A/D125A</sup> mice fed DDC diet for 4 weeks or subjected to BDL 7 days were immunostained for  $\alpha$ -smooth muscle actin ( $\alpha$ SMA, green) and counterstained with DAPI ( $n=6$ ) or stained with Sirius Red to reveal collagen deposition. The fibrotic areas were measured by Image J. The percentages of fibrotic areas were assessed by Image J analysis of microphotographs of six randomly selected fields. (B) Expression of *Tgfb1* in *Ccn1*<sup>WT/WT</sup> and *Ccn1*<sup>D125A/D125A</sup> mice livers which were subjected to BDL for 7 days was assessed by qRT-PCR ( $n=4$ ). . Data represent means  $\pm$  SD. \* $P<0.033$ , \*\* $P<0.002$ . Scale bars: 100  $\mu$ m.

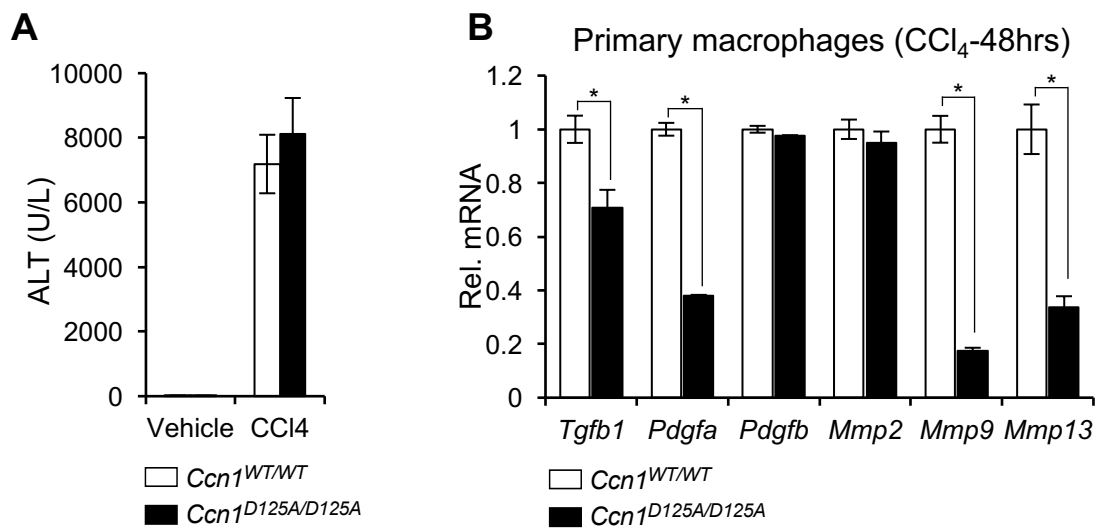

**Figure S4.** (A) Serum ALT levels were measured 48 hrs after CCl<sub>4</sub> injection ( $n=6$ ). (B) Macrophages were isolated from injured livers and expression of indicated genes was assessed by qRT-PCR ( $n=6$ ). . Data represents means  $\pm$  SD. \* $P<0.033$ .

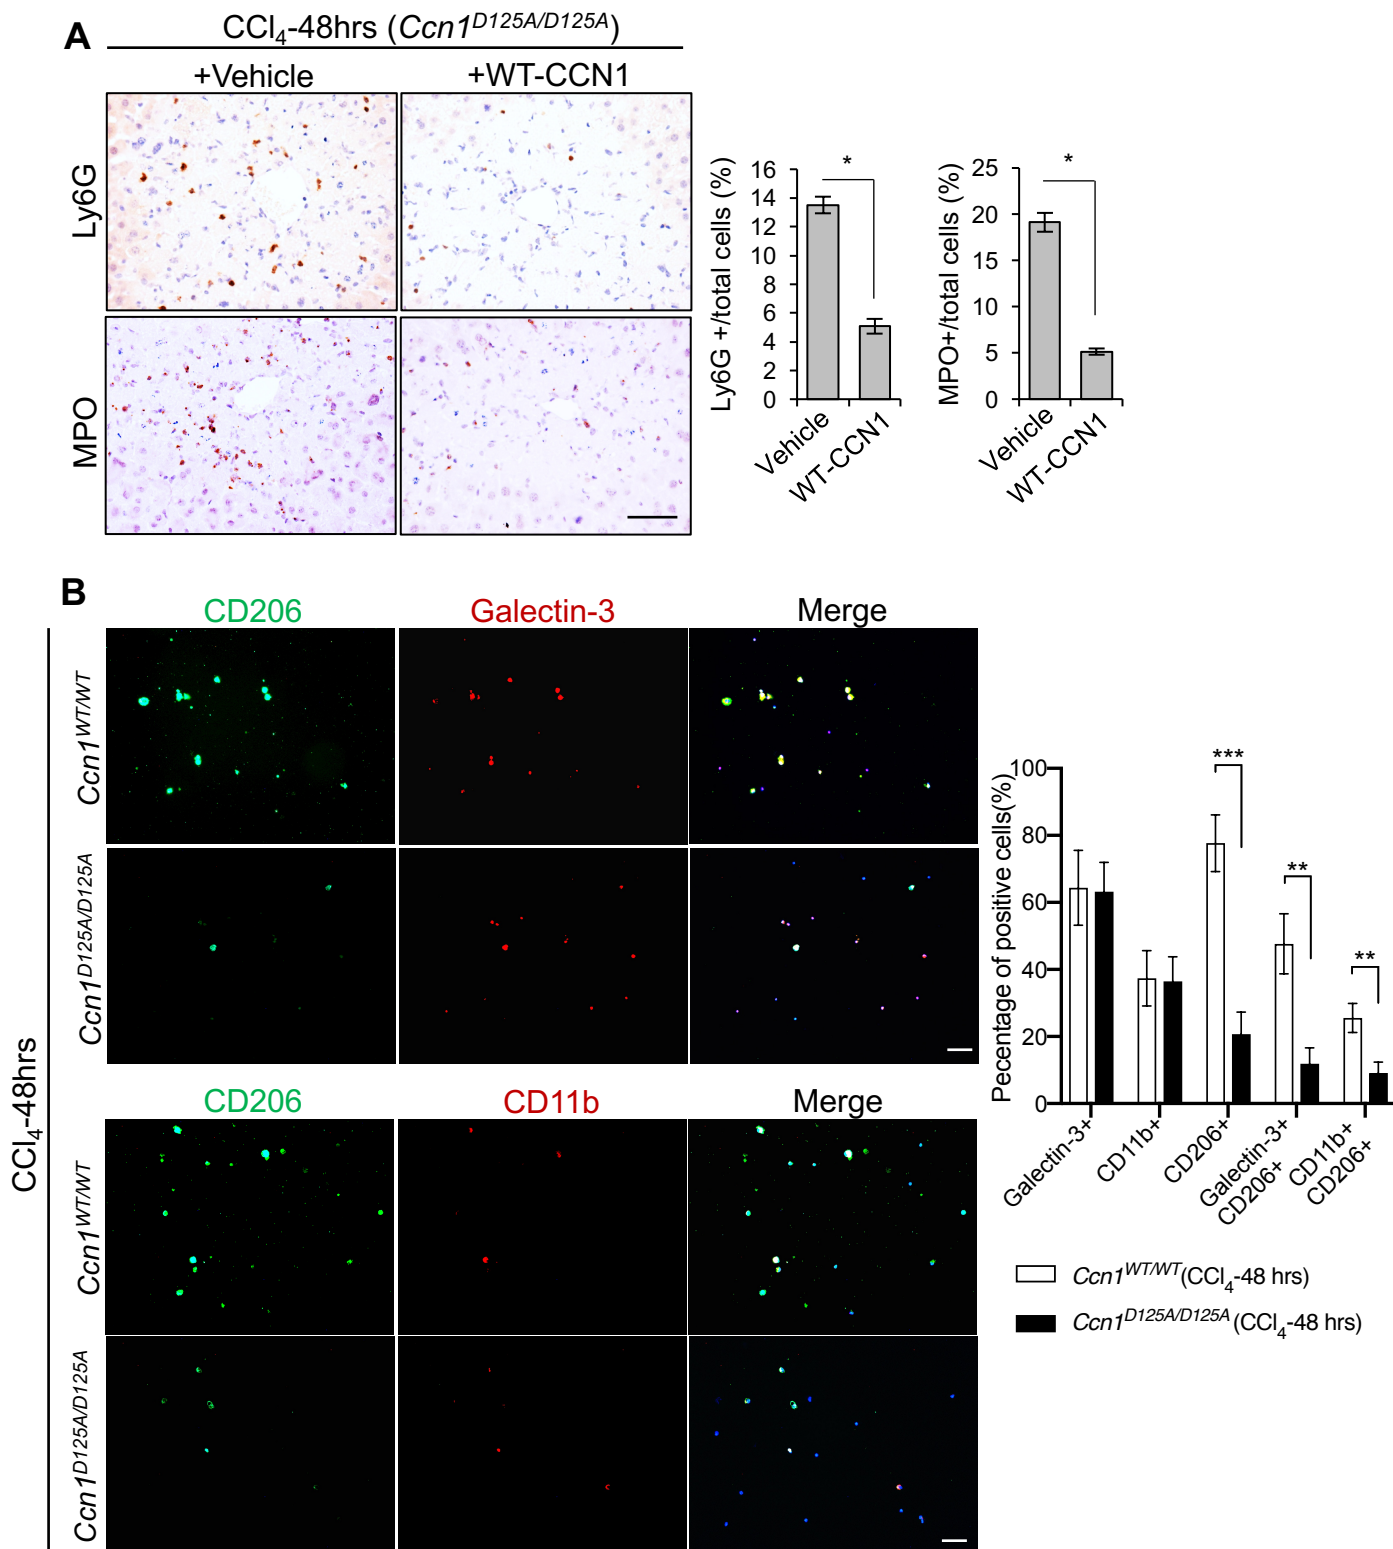

**Figure S5.** (A)  $Ccn1^{D125A/D125A}$  mice were injected with  $\text{CCl}_4$ , followed by *i.p.* injections of either vehicle or CCN1 protein (1 mg/kg) at 4, 24, and 40 hrs thereafter. Livers were collected at 48 hrs after  $\text{CCl}_4$  injection, and liver sections were stained with anti-Ly6G or anti-MPO antibody as indicated and counterstained with hematoxylin (blue). (B)  $Ccn1^{WT/WT}$  and  $Ccn1^{D125A/D125A}$  hepatic macrophages isolated 48 hrs after injection of  $\text{CCl}_4$  were co-stained with CD206 and Galectin-3 or CD206 and CD11b. The percentages of positive cells were quantified ( $n=4$ ). \* $P < 0.033$ , \*\* $P < 0.002$ , \*\*\* $P < 0.001$ . Data represents means  $\pm$  SD. Scale bars: 100  $\mu\text{m}$ .

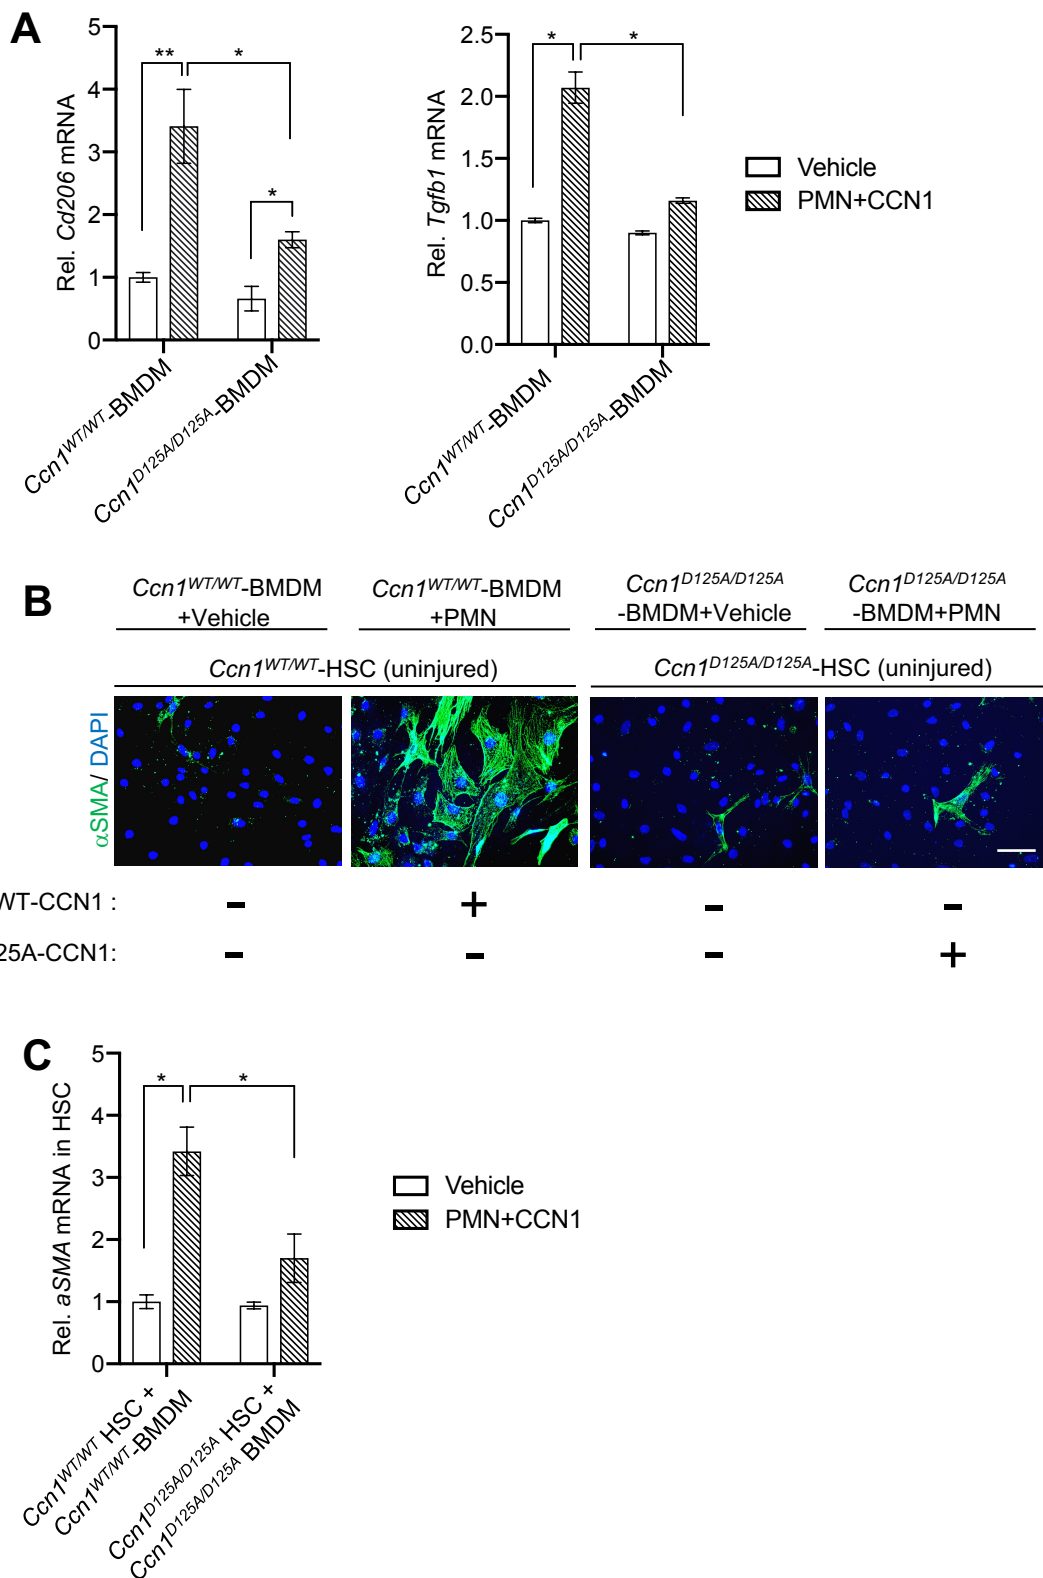

**Figure S6.** Bone marrow derived macrophages (BMMs) from *Ccn1*<sup>WT/WT</sup> and *Ccn1*<sup>D125A/D125A</sup> mice were incubated for 4 hrs with their own apoptotic neutrophils, which were pre-treated with their own type of CCN1. (A) The expression of *cd206* and *Tgfb1* were assessed by qRT-PCR ( $n=4$ ). (B) HSCs isolated from uninjured *Ccn1*<sup>WT/WT</sup> and *Ccn1*<sup>D125A/D125A</sup> mice were co-cultured for 5 days with BMMs from *Ccn1*<sup>WT/WT</sup> and *Ccn1*<sup>D125A/D125A</sup> mice with or without apoptotic PMN and stained with anti- $\alpha$ SMA antibody. (C) The expression of  $\alpha$ SMA was assessed by qRT-PCR ( $n=4$ ). Data represents means  $\pm$  SD. \* $P<0.033$ , \*\* $P<0.002$ . Scale bars: 100  $\mu$ m.

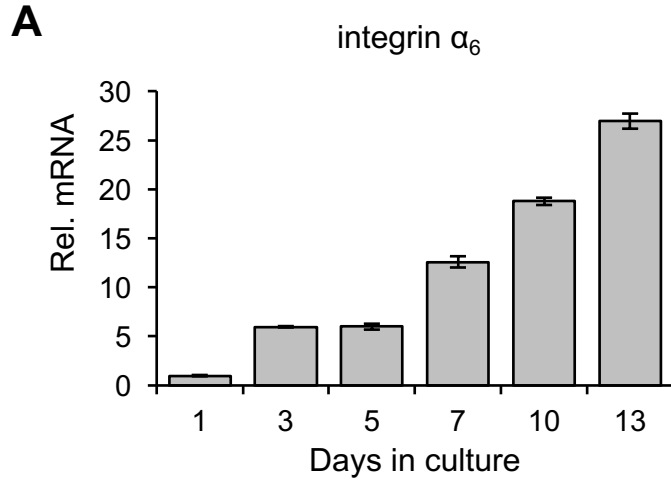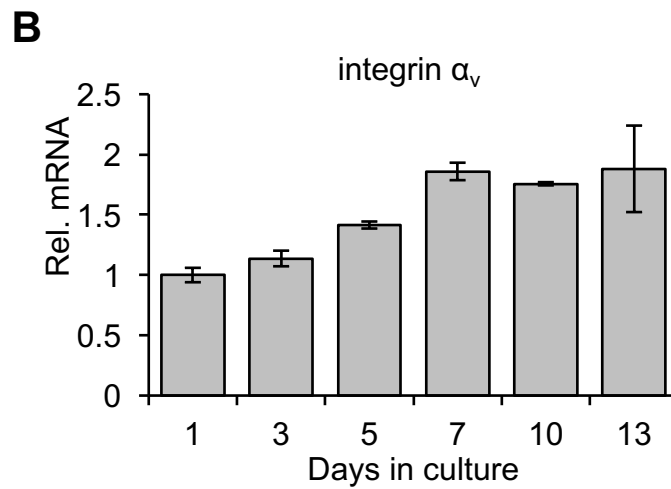

**Figure S7.** HSCs isolated from *Ccn1*<sup>WT/WT</sup> mice 48 hrs after injection with CCl<sub>4</sub> were grown in culture. (A) Integrin  $\alpha_6$  mRNAs level and (B) Integrin  $\alpha_v$  mRNAs level were measured by qRT-PCR ( $n=4$ ). Data represents means  $\pm$  SD.

| Gene                          | Orientation | Sequence (5' to 3')      |
|-------------------------------|-------------|--------------------------|
| <i><math>\alpha</math>SMA</i> | sense       | ctgacagaggcaccactgaa     |
|                               | antisense   | gaaggaatagccacgctcag     |
| <i>Tgf<math>\beta</math>1</i> | sense       | gttttgaccccgaggagc       |
|                               | antisense   | gagaagagagcgcagaatcca    |
| <i>Ccn1</i>                   | sense       | ggaactggcatctccaca       |
|                               | antisense   | ttgggccgggtatttctt       |
| <i>Ccn2</i>                   | sense       | taggccctcagcctcact       |
|                               | antisense   | cttgacaggcttggggat       |
| <i>Cyclophilin</i>            | sense       | ttcacaaccacaatggcacaggg  |
|                               | antisense   | tgccgtccagccaatctgtcttat |
| <i>Col1a1</i>                 | sense       | ccaagggtaacagcggtgaa     |
|                               | antisense   | cctcgtttccttctctccg      |
| <i>Mmp2</i>                   | sense       | taacctggatgccgtcgt       |
|                               | antisense   | ttcaggaataagcacccttgaa   |
| <i>Mmp9</i>                   | sense       | cgtcgtgatcccacttact      |
|                               | antisense   | aacacacagggttgccttc      |
| <i>Mmp13</i>                  | sense       | agttgacaggctccgagaaa     |
|                               | antisense   | ggcactccacatcctggttt     |
| <i>Pdgfa</i>                  | sense       | gtgcgacctccaacctga       |
|                               | antisense   | ggctcatctcacctcacatct    |
| <i>Pdgf<math>\beta</math></i> | sense       | cggcctgtgactagaagtc      |
|                               | antisense   | gagcttgaggcgtcttgg       |
| <i>Egf</i>                    | sense       | agaaacaccaagacccaag      |
|                               | antisense   | tgtgccattccatctatgtg     |
| <i>Igf</i>                    | sense       | accgaggggcttttacttca     |
|                               | antisense   | tggctcaccttctctctcc      |

Table S1. Primer sequences used in this study.



| Elisa kit                  | Company and catalog number |
|----------------------------|----------------------------|
| TGF- $\beta$ 1             | BioLegend (436707)         |
| Free active TGF- $\beta$ 1 | BioLegend (437707)         |

Table S2. Elisa kits used in this study.

| Antibody         | dilution | Company and catalog number |
|------------------|----------|----------------------------|
| $\alpha$ -SMA    | 1:200    | abcam (ab7817)             |
| Ly6G             | 1:300    | BD pharmigen (551460)      |
| Cleaved-Caspase3 | 1:300    | Cell signaling (9661S)     |
| CD206            | 1:500    | Cell signaling (24595T)    |
| Galectin-3       | 1:300    | Cell signaling (89572S)    |
| CD11b            | 1:300    | Cell signaling (17800S)    |
| F4/80            | 1:300    | Bio-Rad (MCA497RT)         |
| MPO              | 1:150    | invitrogen (PA5-16672)     |
| CD68             | 1:200    | Abcam (ab53444)            |

Table S3. Antibodies used in staining.

| Antibody             | dilution | Company and catalog number |
|----------------------|----------|----------------------------|
| Anti-Phospho-Smad2   | 1:1000   | Cell signaling (18338)     |
| anti-Smad2           | 1:1000   | Cell signaling (5339)      |
| anti-CCN1            | 1:800    | R&D Systems (AF4055)       |
| anti- $\beta$ -actin | 1:20000  | Abcam (ab8226)             |

Table S4. Antibodies used in Western blots
